# Supplementary material for: How Can We Find Out What Indigenous Children and Their Families Need to Manage Weight? Lessons from Formative Nutrition Intervention Research with First Australians
Source: MDPI journal article supplement (doi:10.3390/nu15234982), 2023-12-01
Supplement: s1 [file s1]

## Supplementary Material File S1: Talking Points (Tables 1 to 4)

### 1. Need (Is there a need for a nutrition-related health service for childhood weight?)

| Question                                                                                                                                                                                                                                                                                        | Prompts                                                                                                                 |
|-------------------------------------------------------------------------------------------------------------------------------------------------------------------------------------------------------------------------------------------------------------------------------------------------|-------------------------------------------------------------------------------------------------------------------------|
| <b>Icebreaker Q:</b> Before we get started, let's get to know each other a little bit. If everyone can share their name and something about themselves that would be great! (For eg. What brought you here today? Are you a mother, father, grandmother? Do you have kids/grandkids? How many?) |                                                                                                                         |
| Do you think overweight and obesity is an issue in Aboriginal & Torres Strait Islander children in your community?                                                                                                                                                                              | <ul style="list-style-type: none"> <li>- If yes, why do you say that?</li> <li>- If no, why do you say that?</li> </ul> |
| Do you think families would like help and advice to talk about and address the issue?                                                                                                                                                                                                           | <ul style="list-style-type: none"> <li>- How should this advice be offered?</li> </ul>                                  |
| Would healthy foods for the Aboriginal & Torres Strait Islander community help?                                                                                                                                                                                                                 | <ul style="list-style-type: none"> <li>- Why or why not?</li> </ul>                                                     |
| Would you like someone to talk to you about healthy food and your child's health?                                                                                                                                                                                                               | <ul style="list-style-type: none"> <li>- Who should talk to them about this?</li> </ul>                                 |
| Are there any reasons why children/families would or wouldn't use a healthy eating service to help healthy weight in children in your community?                                                                                                                                                |                                                                                                                         |
| What have been the barriers for children/families to using a nutrition-related health service previously?                                                                                                                                                                                       |                                                                                                                         |
| <b>Other feedback on need for a new service questions:</b>                                                                                                                                                                                                                                      |                                                                                                                         |

## 2. Service Design (what should the service look like?)

| Question                                                                                                                                                                                                                                                   | Prompts                                                                                                                                                        |
|------------------------------------------------------------------------------------------------------------------------------------------------------------------------------------------------------------------------------------------------------------|----------------------------------------------------------------------------------------------------------------------------------------------------------------|
| If the service looked like this ( <a href="#">show Model of Service Delivery</a> ), what would you think?<br>(Eg. A local service tailored for Aboriginal & Torres Strait Islanders, that provides dietitian and exercise services, and nutrition support) | <ul style="list-style-type: none"> <li>- What do you like? Dislike?</li> <li>- Anything missing? Anything to remove?</li> </ul>                                |
| What do you think the service should look like?                                                                                                                                                                                                            | <ul style="list-style-type: none"> <li>- Who should attend?</li> <li>- Should they be individual or group appointments?</li> </ul>                             |
| Who should help with a healthy food service (i.e. Health Worker, Dietitian, Exercise Physiologist, Nurse, Doctor, Spiritual Healer)?                                                                                                                       |                                                                                                                                                                |
| How often to you think children/families should visit the service?                                                                                                                                                                                         |                                                                                                                                                                |
| Where do you think the service should be located?                                                                                                                                                                                                          | <ul style="list-style-type: none"> <li>- Within existing service or a new place?</li> <li>- Do you have any suggestions where it should be located?</li> </ul> |
| Other feedback on questions for what the new service should look like:                                                                                                                                                                                     |                                                                                                                                                                |

### 3. Content (what should be talked about?)

| Question                                                                                              | Prompts                                                                                                                                                                                                                                            |
|-------------------------------------------------------------------------------------------------------|----------------------------------------------------------------------------------------------------------------------------------------------------------------------------------------------------------------------------------------------------|
| What areas of health do you think the clinic should focus on to support a healthy weight in children? | <ul style="list-style-type: none"><li>- What about food and nutrition?<ul style="list-style-type: none"><li>o Traditional foods?</li></ul></li><li>- Physical activity?</li><li>- Screen-time?</li><li>- Social and emotional wellbeing?</li></ul> |
| Other feedback on questions related to what should be talked about:                                   |                                                                                                                                                                                                                                                    |

#### 4. Engagement (connecting with the new service)

| Question                                                                                                                                        | Prompts                                                      |
|-------------------------------------------------------------------------------------------------------------------------------------------------|--------------------------------------------------------------|
| How would you/families like to find out about a new nutrition-related health service to help with healthy weight in children in your community? |                                                              |
| How would you/families like trust to be built with the new service and with Health Professionals delivering the service?                        |                                                              |
| What would make you/families want to come back for further sessions at the service?                                                             |                                                              |
| Can you suggest a name for the service?                                                                                                         | - What social media outlets should we use to get more input? |
| <b>Other feedback on connecting with the new service questions</b>                                                                              |                                                              |
